# Supplementary material for: Effect of Graphene vs. Reduced Graphene Oxide in Gold Nanoparticles for Optical Biosensors—A Comparative Study
Source: MDPI journal article supplement (doi:10.3390/bios12030163), 2022-03-04
Supplement: s1 [file s1]

*Supplementary Materials*

# Effect of Graphene vs. Reduced Graphene Oxide in Gold Nanoparticles for Optical Biosensors—A Comparative Study

Ana P. G. Carvalho <sup>1,\*</sup>, Elisabete C. B. A. Alegria <sup>1,2</sup>, Alessandro Fantoni <sup>3,4</sup>, Ana M. Ferraria <sup>5,6</sup>, Ana M. Botelho do Rego <sup>5,6</sup> and Ana P. C. Ribeiro <sup>2</sup>

<sup>1</sup> Departamento de Engenharia Química, ISEL, Instituto Politécnico de Lisboa, 1949-014 Lisbon, Portugal; elisabete.alegria@isel.pt

<sup>2</sup> Centro de Química Estrutural, Instituto Superior Técnico, Universidade de Lisboa, 1049-001 Lisbon, Portugal; apribeiro@tecnico.ulisboa.pt

<sup>3</sup> Departamento de Engenharia Eletrónica e Telecomunicações e de Computadores, ISEL, Instituto Politécnico de Lisboa, 1949-014 Lisbon, Portugal; afantoni@deetc.isel.ipl.pt

<sup>4</sup> Centro de Tecnologias e Sistemas, UNINOVA, Faculdade de Ciências e Tecnologia, 2829-517 Caparica, Portugal

<sup>5</sup> iBB—Institute for Bioengineering and Biosciences and Departamento de Engenharia Química, Instituto Superior Técnico, Universidade de Lisboa, Av. Rovisco Pais, 1049-001 Lisbon, Portugal; ana.ferraria@tecnico.ulisboa.pt (A.M.F.); amrego@tecnico.ulisboa.pt (A.M.B.d.R.)

<sup>6</sup> Associate Laboratory i4HB—Institute for Health and Bioeconomy at Instituto Superior Técnico, Universidade de Lisboa, Av. Rovisco Pais, 1049-001 Lisbon, Portugal

\* Correspondence: ana.carvalho.ana@gmail.com

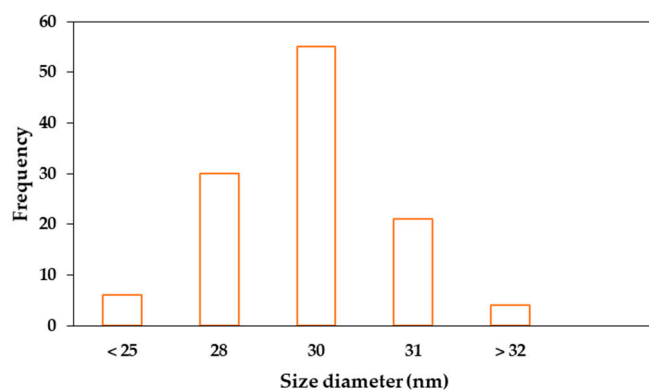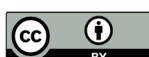

**Copyright:** © 2022 by the authors. Licensee MDPI, Basel, Switzerland. This article is an open access article distributed under the terms and conditions of the Creative Commons Attribution (CC BY) license (<https://creativecommons.org/licenses/by/4.0/>).

(a)

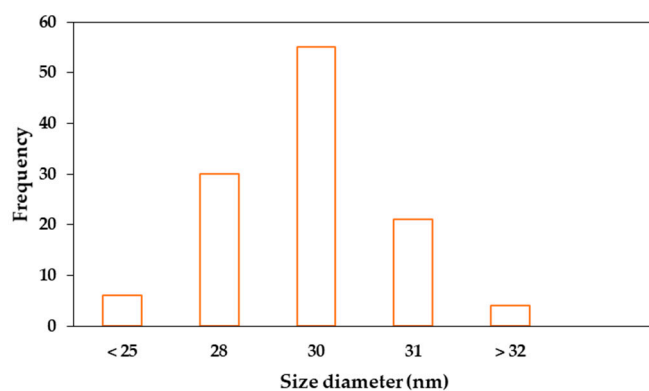

(b)

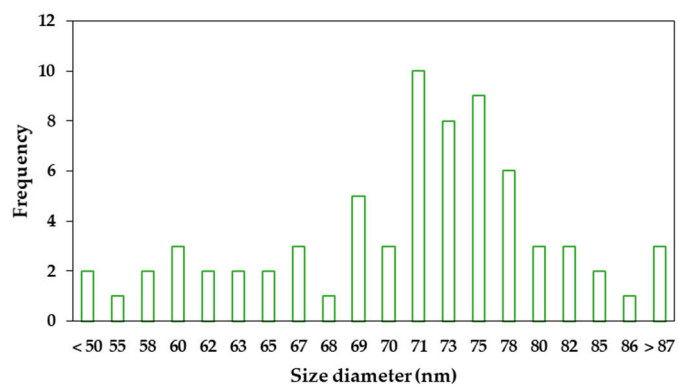

(c)

**Figure S1.** Frequency vs. size distribution: a) for Figure 3a; b) for Figure 3b and c) for Figure 5.

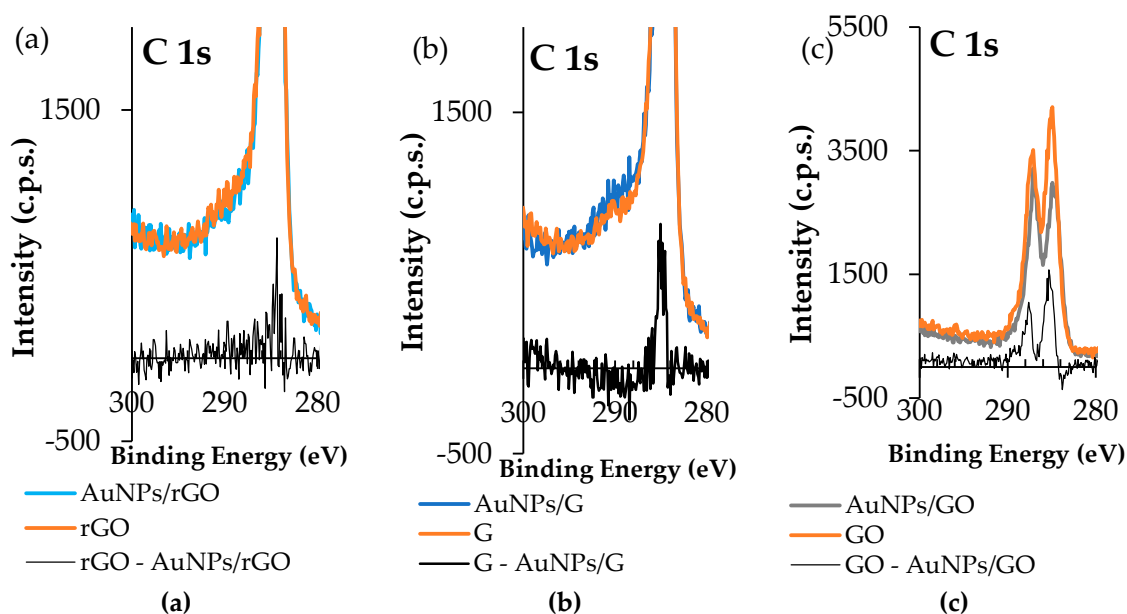

**Figure S2.** C 1s spectral differences between (a) AuNPs/rGO and rGO; (b) AuNPs/G and G and (c) AuNPs/GO and GO.

Figure S2 shows that: rGO has slightly more  $sp^2$  carbon than AuNPs/rGO; G has a larger amount of aliphatic carbon than AuNPs/G. In AuNPs/GO versus GO, one can see that the C 1s signal for GO is stronger than for AuNPs/GO, which leads to a spectrum “difference” showing more aliphatic carbon and more oxidized carbonaceous moieties in GO. However, it is clear from the C 1s profiles that in GO, the main peak, centred at lower BE (which includes peaks at 284.4 eV and 285 eV, attributed to non-oxidized carbon atoms), is larger than the peak at higher BE, which includes carbon atoms bonded to oxygen (Figure 6 (d)). In AuNPs/GO, the oxidized carbon features have nearly the same intensity as the non-oxidized carbon peak.

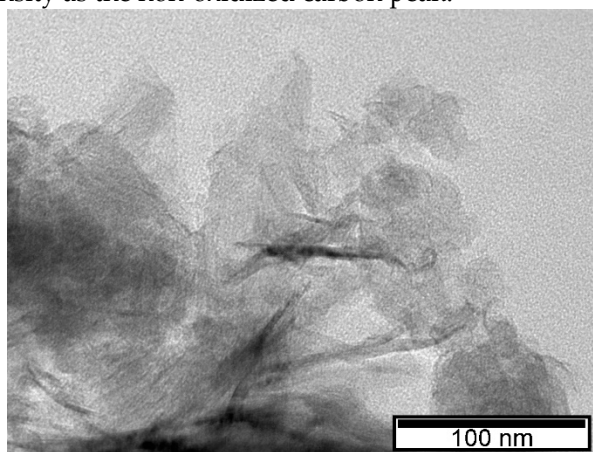

(a)

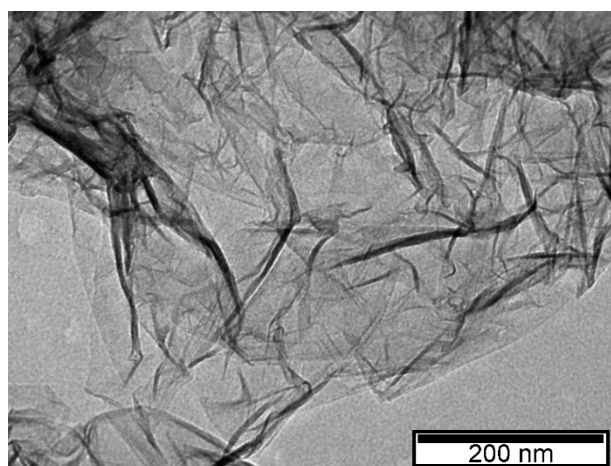

(b)

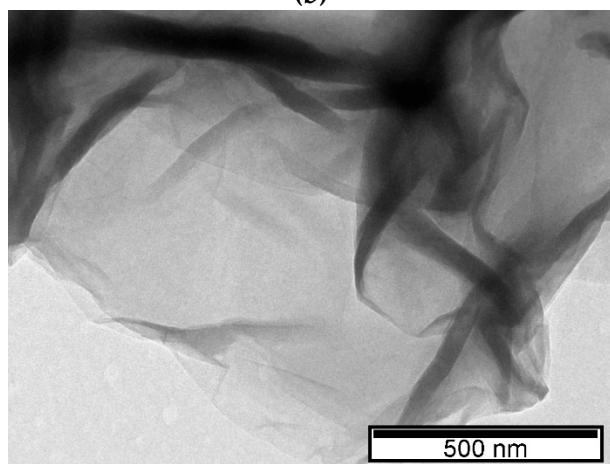

(c)

**Figure S3.** TEM image for (a) – G; (b) – rGO and (c) – GO.

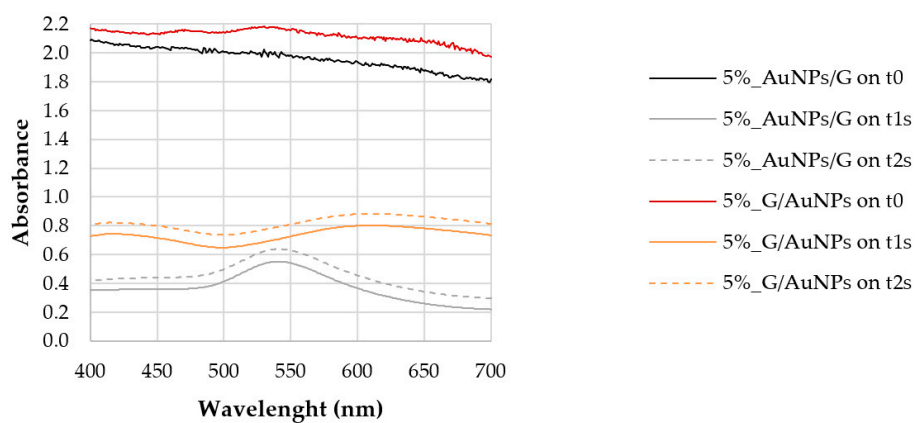

**Figure S4.** LSPR of AuNPs and G composite (SQ1 and SQ2) at  $t_0$ ,  $t_{1w}$  and  $t_{2w}$ .

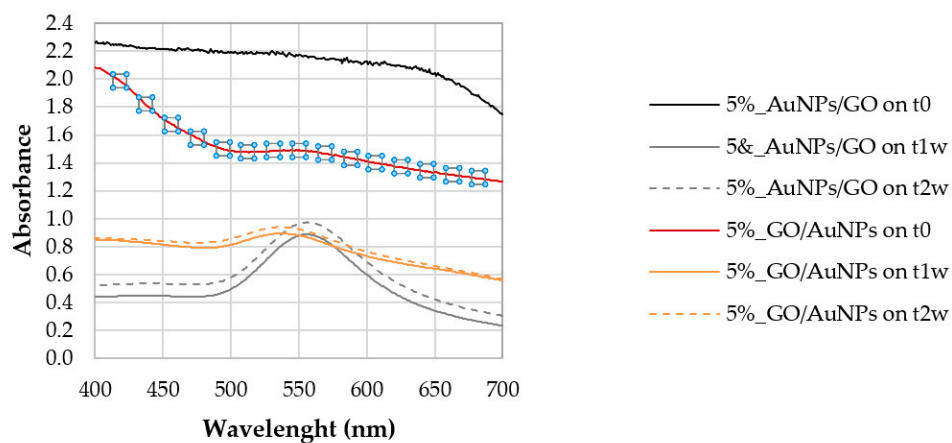

**Figure S5.** LSPR of AuNPs and GO composite (SQ1 and SQ2) at  $t_0$ ,  $t_{1w}$  and  $t_{2w}$ .

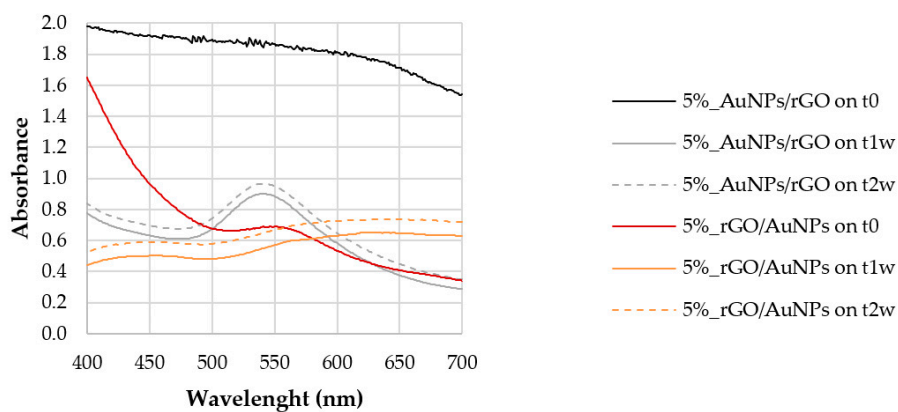

**Figure S6.** LSPR of AuNPs and rGO composite (SQ1 and SQ2) at  $t_0$ ,  $t_{1w}$  and  $t_{2w}$ .
